# Supplementary material
Source: publisher figshare collection journal article supplement (https://frontiersin.figshare.com/ndownloader/files/16940825)
Supplement: Supplementary file [file 16940825]

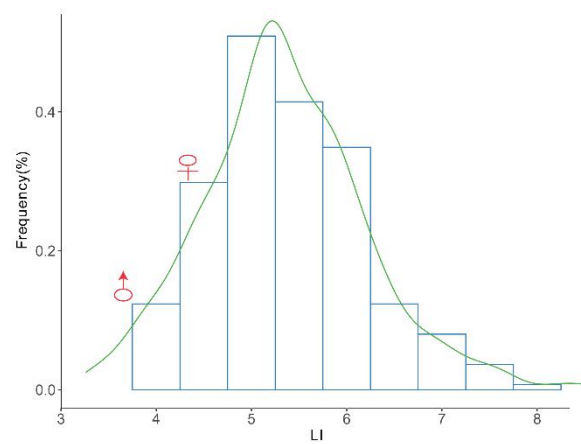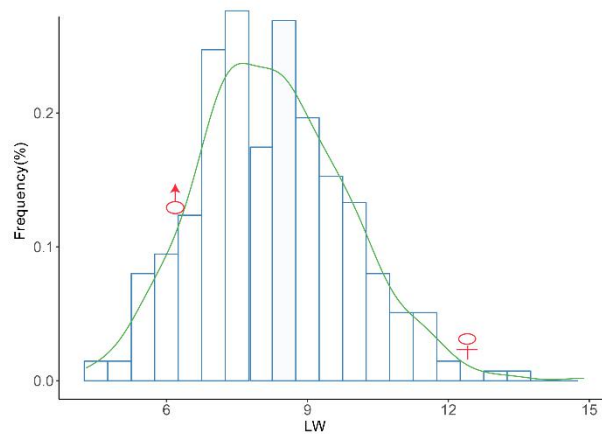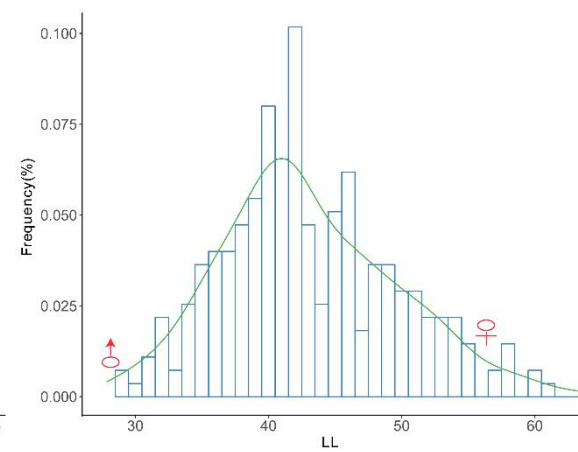

Frequency distribution histograms of Leaf Index (LI), Leaf Width (LW) and Leaf Length (LL) in 2015.

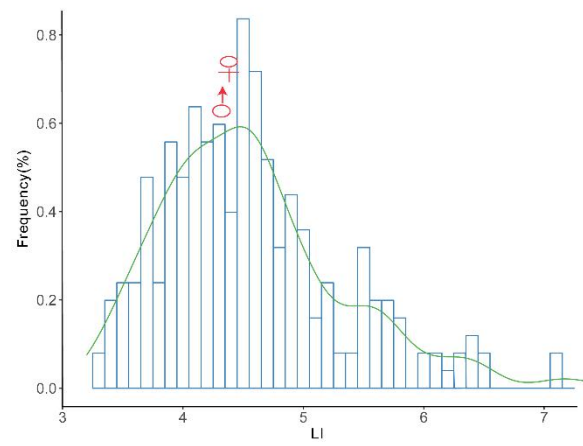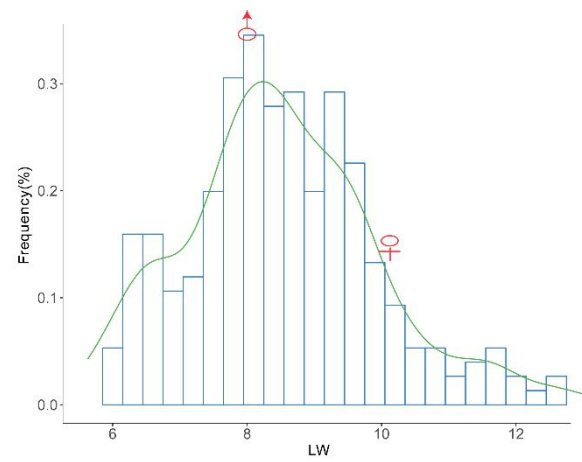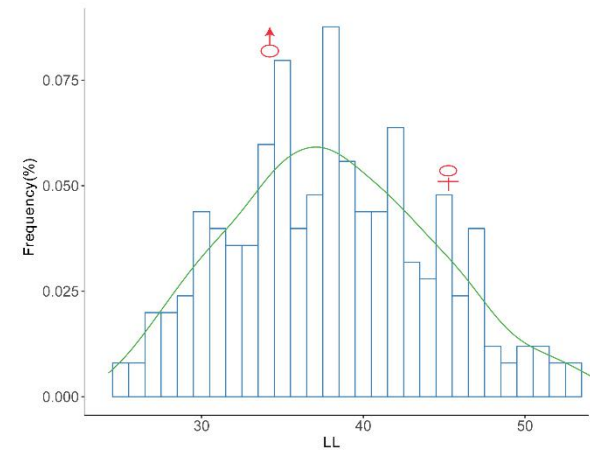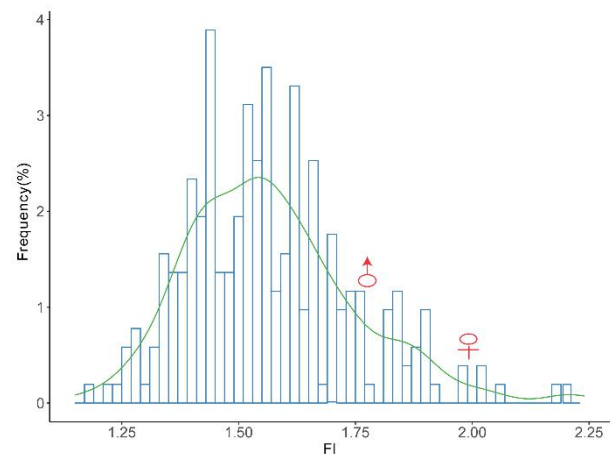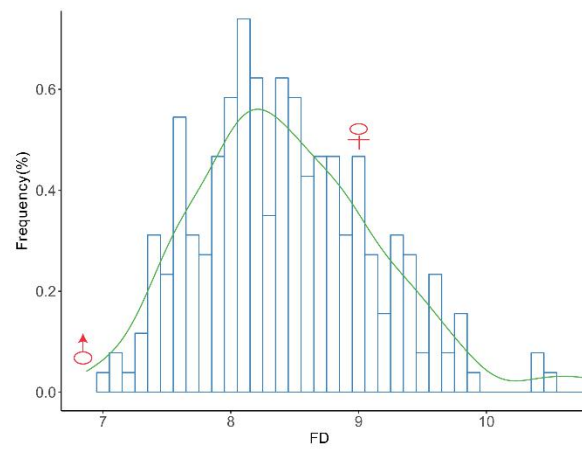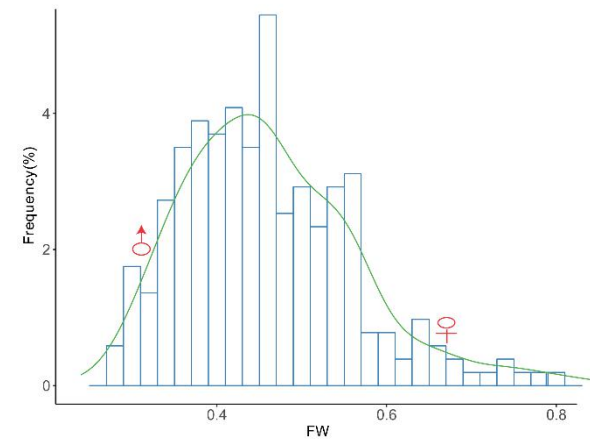

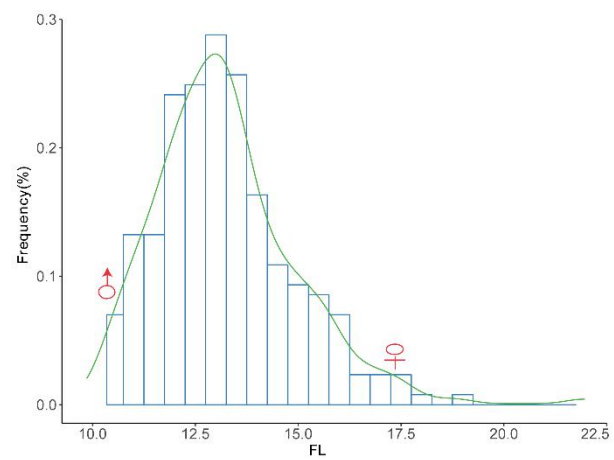

Frequency distribution histograms of leaf index (LI), leaf width (LW), leaf length (LL), single fruit weight (FW), fruit longitude (FL), fruit diameter (FD) and fruit index (FI) in 2016.

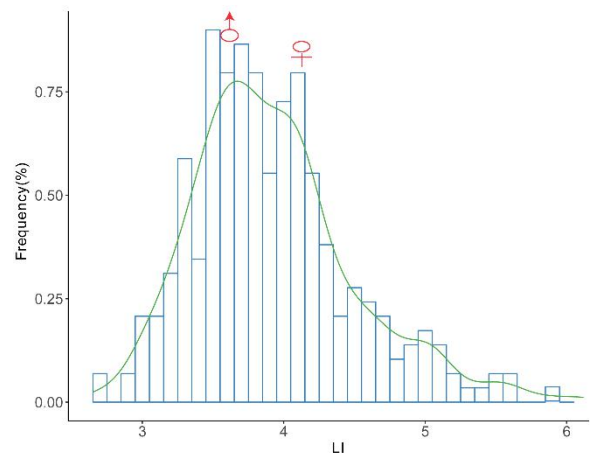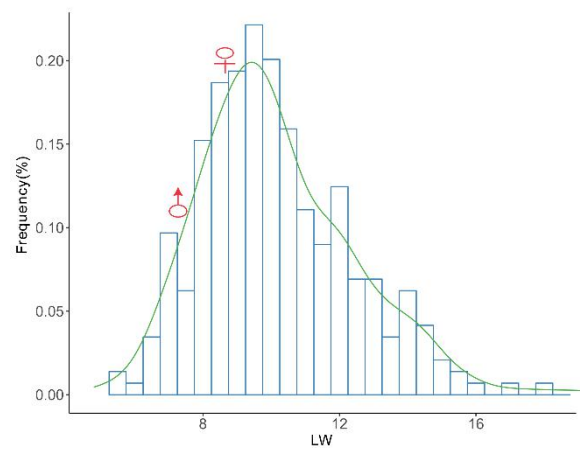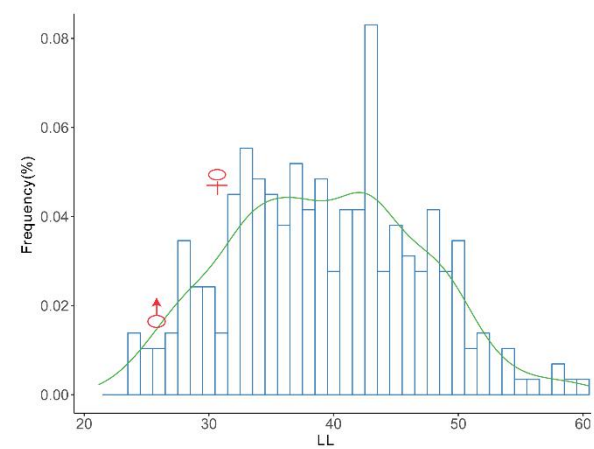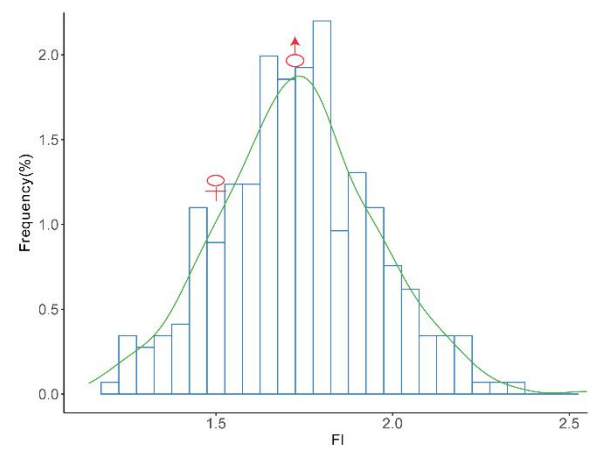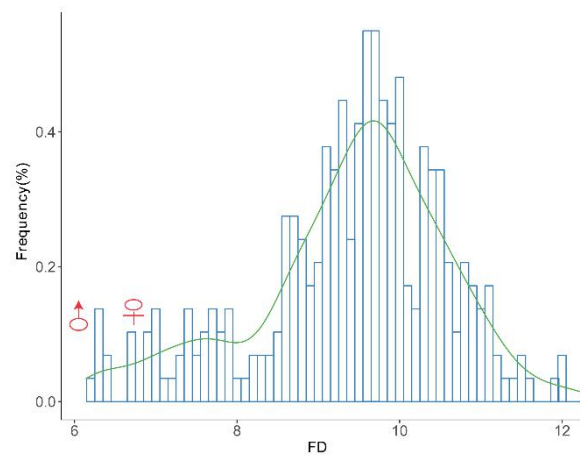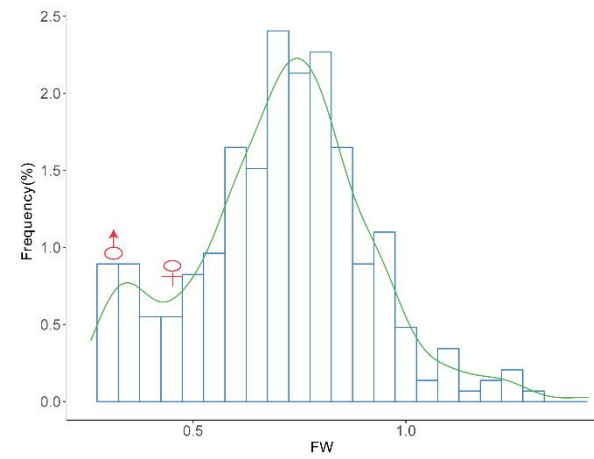

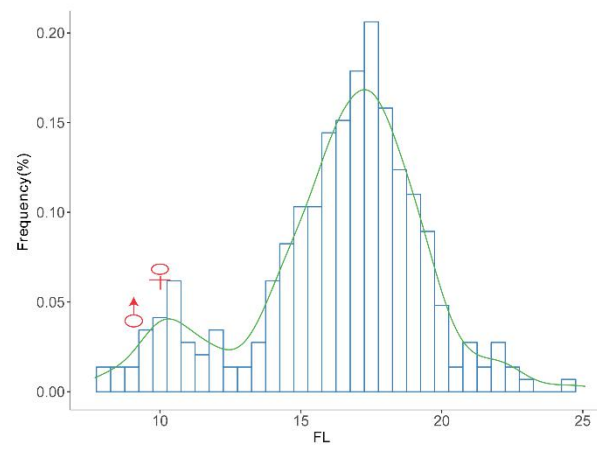

Frequency distribution histograms of leaf index (LI), leaf width (LW), leaf length (LL), single fruit weight (FW), fruit longitude (FL), fruit diameter (FD) and fruit index (FI) in 2017.
